# Supplementary material for: MassGenie: A Transformer-Based Deep Learning Method for Identifying Small Molecules From Their Mass Spectra
Source: Preprints.org preprint supplement (doi:10.20944/preprints202110.0355.v1), 2021-10-25
Supplement: Supplementary file 1 [file supplementary]

## Sheet: CASMI_MassGenie_results (1)
challengename	ION_MODE	RT_sec	RT_min	PRECURSOR_MZ	nPeaks	SMILES	Challenge	Chem_Formula	MassSpectra	newResults	newTanimoto
challenge-001	POSITIVE	828	13.8	273.1	14	c1cc(ccc1C1COc2cc(cc(c2C1=O)O)O)O	challenge-001	C15H12O5	[77.0381, 95.0487, 107.0484, 123.0431, 151.0383, 153.0187, 167.0337, 179.0329, 199.0751, 225.0553, 227.0709, 245.0811, 255.064, 273.077]	{'O=C(O)C1c2ccccc2OC2C3C=CC(O3)C(=O)C12', 'O=C(O)c1ccc(O)c(C(=O)C(O)c2ccccc2)c1', 'O=C1OC2C3C=CC(CC(=O)c4ccccc4)(O3)C12O', 'O=C1C2C3C=CC(O2)C1C(=O)c1ccc(O)cc1C3O', 'O=C(OCC(=O)c1ccc(O)cc1)c1ccc(O)cc1', 'O=C(O)c1ccc(C(=O)OC2CC3C=CC(=O)C32)cc1', 'O=C(O)C1=C(c2ccc(O)cc2)C2OC(=O)C3CC1C23', 'O=C(O)c1ccc(C(=O)O)c(C(=O)C2C=CC=CC2)c1', 'O=C(O)C1=C(c2ccc(O)cc2)C2C=CC(O)C1C2=O', 'O=C(O)c1ccc(C2OC(=O)C3C=CC…	0.531073
challenge-002	POSITIVE	1158	19.3	339.2	22	C=C(C)C(C)c1cc(/C=C/C(=O)c2ccc(cc2)O)c(cc1O)OC	challenge-002	C21H22O4	[65.0485, 93.0358, 107.0519, 111.0472, 121.0289, 147.0477, 149.0613, 177.0593, 189.0788, 191.11, 199.105, 203.1043, 219.1104, 227.0974, 229.0893, 230.0937, 245.1199, 271.0984, 283.102, 297.1499, 307.1382, 339.1614]	['C(=C/c1c(OC)cc(O)c(C(C(=C)C)C)c1)\\C(c1ccc(O)cc1)=O', 'Oc1ccc(C(/C=C/c2cc(C(C(=C)C)C)c(O)cc2OC)=O)cc1', 'c1(O)ccc(C(/C=C/c2c(OC)cc(O)c(C(C)C(C)=C)c2)=O)cc1']	1
challenge-003	POSITIVE	798	13.3	312.2	7	COc1ccc(CCN=C(/C=C/c2ccccc2)O)cc1OC	challenge-003	C19H21NO3	[77.0405, 103.0561, 131.0485, 165.0929, 182.1173, 295.1352, 312.1592]	['O(C)c1c(OC)cc(CCN=C(O)/C=C/c2ccccc2)cc1']	1
challenge-004	POSITIVE	762	12.7	271.1	19	c1cc(ccc1c1c(c(=O)c2ccc(cc2o1)O)O)O	challenge-004	C15H10O5	[65.0387, 81.0333, 105.0311, 121.028, 133.0271, 137.0232, 141.0696, 149.022, 169.0635, 181.066, 187.0747, 197.0596, 213.0538, 215.0713, 225.0537, 242.0576, 243.0655, 253.0502, 271.0608]	['c12c(cc(O)cc1)oc(-c1ccc(O)cc1)c(O)c2=O', 'c12ccc(O)cc1oc(-c1ccc(O)cc1)c(O)c2=O', 'c1(O)ccc2c(=O)c(O)c(-c3ccc(O)cc3)oc2c1', 'o1c(-c2ccc(O)cc2)c(O)c(=O)c2ccc(O)cc12', 'Oc1ccc(-c2oc3cc(O)ccc3c(=O)c2O)cc1', 'c12c(cc(O)cc1)oc(-c1ccc(O)cc1)c(O)c2=O', 'c1c(O)ccc(-c2oc3c(c(=O)c2O)ccc(O)c3)c1', 'c1c(O)ccc(-c2c(O)c(=O)c3c(cc(O)cc3)o2)c1', 'c1(O)c(-c2ccc(O)cc2)oc2cc(O)ccc2c1=O', 'c12c(cc(O)cc1)oc(-c1ccc(O…	1
challenge-005	POSITIVE	714	11.9	271.1	16	c1cc(c(cc1/C=C\1/C(=O)c2ccc(cc2O1)O)O)O	challenge-005	C15H10O5	[109.0298, 115.0556, 137.0235, 141.0684, 161.0254, 169.0633, 181.0659, 187.0739, 197.0626, 200.0459, 201.0532, 215.0689, 225.0554, 243.0632, 253.0516, 271.0608]	['c1c(/C=C2\\Oc3cc(O)ccc3C2=O)cc(O)c(O)c1', 'c1c(O)c(O)cc(/C=C2/C(=O)c3ccc(O)cc3O2)c1', 'Oc1c(O)ccc(/C=C2/C(=O)c3ccc(O)cc3O2)c1', 'Oc1cc(/C=C2\\Oc3cc(O)ccc3C2=O)ccc1O', 'c12c(ccc(O)c1)C(=O)/C(=C/c1ccc(O)c(O)c1)O2', 'O1/C(=C\\c2cc(O)c(O)cc2)C(=O)c2ccc(O)cc21', 'c12c(ccc(O)c1)C(=O)/C(=C/c1cc(O)c(O)cc1)O2', 'O=C1/C(=C/c2cc(O)c(O)cc2)Oc2cc(O)ccc21', 'Oc1ccc2c(c1)O/C(=C\\c1cc(O)c(O)cc1)C2=O']	1
challenge-006	POSITIVE	786	13.1	271.1	20	c1cc(c(cc1c1cc(=O)c2ccc(cc2o1)O)O)O	challenge-006	C15H10O5	[81.0327, 109.0299, 115.0169, 117.0347, 135.0426, 137.0226, 139.0572, 141.0681, 155.0365, 157.0648, 161.0243, 169.064, 185.0618, 197.0614, 211.0404, 215.0699, 225.0552, 243.0637, 253.0477, 271.0614]	['c1c(O)c(O)ccc1-c1cc(=O)c2c(cc(O)cc2)o1', 'Oc1ccc(-c2oc3c(ccc(O)c3)c(=O)c2)cc1O', 'c1(O)c(O)ccc(-c2oc3c(c(=O)c2)ccc(O)c3)c1', 'c1cc2c(cc1O)oc(-c1ccc(O)c(O)c1)cc2=O', 'c1c(=O)c2c(oc1-c1cc(O)c(O)cc1)cc(O)cc2', 'c1c(-c2cc(=O)c3c(o2)cc(O)cc3)cc(O)c(O)c1', 'Oc1c(O)ccc(-c2cc(=O)c3c(cc(O)cc3)o2)c1', 'Oc1cc2oc(-c3cc(O)c(O)cc3)cc(=O)c2cc1', 'c1c(O)c(O)ccc1-c1oc2cc(O)ccc2c(=O)c1', 'Oc1ccc(-c2oc3cc(O)ccc3c…	1
challenge-007	POSITIVE	846	14.1	271.1	16	c1cc(ccc1c1cc(=O)c2c(cc(cc2o1)O)O)O	challenge-007	C15H10O5	[67.0206, 69.0076, 91.0503, 119.0488, 121.0278, 141.0705, 145.029, 153.0183, 163.0368, 169.0525, 197.0624, 225.0558, 229.0495, 243.0662, 253.0491, 271.0612]	['c1c(O)ccc(-c2oc3c(c(O)cc(O)c3)c(=O)c2)c1', 'c1cc(-c2cc(=O)c3c(O)cc(O)cc3o2)ccc1O', 'c1c(-c2ccc(O)cc2)oc2cc(O)cc(O)c2c1=O', 'c1c2c(c(=O)cc(-c3ccc(O)cc3)o2)c(O)cc1O', 'c1(O)c2c(=O)cc(-c3ccc(O)cc3)oc2cc(O)c1', 'O=c1c2c(O)cc(O)cc2oc(-c2ccc(O)cc2)c1', 'c1(=O)c2c(O)cc(O)cc2oc(-c2ccc(O)cc2)c1', 'c1c(-c2oc3c(c(O)cc(O)c3)c(=O)c2)ccc(O)c1']	1
challenge-008	POSITIVE	816	13.6	271.1	24	COc1cc(ccc1/C=C/C(=O)c1ccc(cc1)O)O	challenge-008	C16H14O4	[65.0403, 77.0383, 93.0364, 103.04, 107.0514, 111.0458, 121.0281, 123.0428, 134.0382, 147.0425, 151.0528, 153.0716, 162.0325, 165.0644, 169.0665, 177.057, 181.0673, 183.0846, 211.0746, 225.0931, 229.0872, 239.0692, 253.0875, 271.0953]	['c1c(O)cc(OC)c(/C=C/C(=O)c2ccc(O)cc2)c1', 'c1cc(O)ccc1C(=O)/C=C/c1ccc(O)cc1OC', 'c1(OC)c(/C=C/C(c2ccc(O)cc2)=O)ccc(O)c1', 'O=C(/C=C/c1ccc(O)cc1OC)c1ccc(O)cc1', 'c1cc(C(=O)/C=C/c2c(OC)cc(O)cc2)ccc1O', 'C(=C/c1ccc(O)cc1OC)\\C(=O)c1ccc(O)cc1', 'Oc1ccc(C(/C=C/c2c(OC)cc(O)cc2)=O)cc1', 'c1(O)cc(OC)c(/C=C/C(c2ccc(O)cc2)=O)cc1', 'c1c(O)ccc(C(/C=C/c2c(OC)cc(O)cc2)=O)c1', 'C(c1ccc(O)cc1)(/C=C/c1c(OC)cc(O)…	1
challenge-010	POSITIVE	108	1.8	223.2	8	CC(=O)N1CCCC(=C1)[C@H]1CCCCN1C	challenge-010	C13H22N2O	[60.0456, 91.0555, 105.0708, 133.1031, 150.1296, 164.1445, 192.1396, 223.181]	['C1=C([C@H]2CCCCN2C)CCCN1C(=O)C', 'C1CN(C)[C@@H](C2=CN(C(C)=O)CCC2)CC1', '[C@@H]1(C2=CN(C(C)=O)CCC2)N(C)CCCC1', 'C1CCC([C@H]2CCCCN2C)=CN1C(C)=O', 'C(C)(=O)N1C=C([C@H]2CCCCN2C)CCC1', 'C1CCC([C@@H]2N(C)CCCC2)=CN1C(C)=O', 'C1[C@H](C2=CN(C(=O)C)CCC2)N(C)CCC1', 'C1CCC[C@H](C2=CN(C(C)=O)CCC2)N1C', 'C1C[C@H](C2=CN(C(=O)C)CCC2)N(C)CC1']	1
challenge-011	POSITIVE	588	9.8	280.2	12	C[N+](C)(C)CCOC(=O)/C=C/c1ccc(c(c1)O)OC	challenge-011	C15H22NO4+	[89.0391, 106.0428, 117.0358, 134.0378, 145.0285, 149.0614, 162.0318, 163.0414, 177.0565, 206.0586, 221.0826, 280.1552]		0
challenge-012	POSITIVE	348	5.8	302.1	31	CO[C@H]1C=C2C3CN(Cc4cc5c(cc34)OCO5)C2C[C@@H]1O	challenge-012	C17H19NO4	[135.0475, 153.0848, 165.0733, 167.0832, 174.0576, 181.066, 183.0824, 185.0618, 187.0614, 193.0646, 195.0834, 197.0617, 197.0945, 199.0785, 211.0767, 213.0912, 223.0752, 224.0839, 226.0877, 227.0729, 240.1059, 241.0889, 242.1043, 252.1042, 253.0988, 255.1011, 256.0786, 258.1148, 270.113, 284.1291, 302.1397]	['c1c2c(cc3c1C1C4=C[C@H](OC)[C@@H](O)CC4N(C3)C1)OCO2', 'C1Oc2c(cc3c(c2)CN2CC3C3=C[C@H](OC)[C@@H](O)CC32)O1', 'c12cc3c(cc1CN1C4C[C@H](O)[C@@H](OC)C=C4C2C1)OCO3', 'N12C3C(=C[C@H](OC)[C@@H](O)C3)C(c3cc4c(cc3C1)OCO4)C2', 'O1c2cc3c(cc2OC1)CN1CC3C2=C[C@H](OC)[C@@H](O)CC21', 'O1c2c(cc3c(c2)C2CN(C3)C3C2=C[C@H](OC)[C@@H](O)C3)OC1', '[C@@H]1(O)[C@@H](OC)C=C2C(C1)N1CC2c2c(cc3c(c2)OCO3)C1', 'C1[C@H](O)[C@@H]…	1
challenge-013	POSITIVE	744	12.4	285.1	23	COc1ccc(cc1O)c1coc2cc(ccc2c1=O)O	challenge-013	C16H12O5	[81.0347, 134.0356, 137.0229, 141.0723, 158.0782, 169.0651, 181.066, 183.0539, 185.0655, 186.0736, 196.0523, 197.0606, 213.0544, 214.0613, 224.0626, 225.0569, 229.0853, 242.059, 253.0511, 257.0832, 269.045, 270.0542, 285.0774]	['c1c(-c2c(=O)c3ccc(O)cc3oc2)ccc(OC)c1O', 'c1c(O)cc2occ(-c3ccc(OC)c(O)c3)c(=O)c2c1', 'Oc1cc2c(cc1)c(=O)c(-c1ccc(OC)c(O)c1)co2', 'c1(O)cc2c(c(=O)c(-c3ccc(OC)c(O)c3)co2)cc1', 'c1c(O)cc2occ(-c3cc(O)c(OC)cc3)c(=O)c2c1', 'c1(O)c(OC)ccc(-c2coc3c(ccc(O)c3)c2=O)c1', 'c1(O)cc(-c2coc3cc(O)ccc3c2=O)ccc1OC', 'COc1ccc(-c2coc3c(ccc(O)c3)c2=O)cc1O', 'c1oc2cc(O)ccc2c(=O)c1-c1cc(O)c(OC)cc1', 'c1cc(OC)c(O)cc1-c1co…	1
challenge-016	POSITIVE	894	14.9	371.2	25	CC(=CCc1c(cc(c2C(=O)C(C(c3ccc(cc3)O)Oc12)O)OC)O)C	challenge-016	C21H22O6	[69.0697, 107.0519, 153.0553, 163.0386, 179.0337, 181.0461, 209.0434, 209.1157, 229.0897, 235.094, 241.0861, 254.0537, 256.07, 257.0771, 269.0821, 271.0988, 285.0745, 297.0778, 297.1474, 310.119, 315.0922, 324.1332, 325.1442, 353.1416, 371.1507]	['O1c2c(CC=C(C)C)c(O)cc(OC)c2C(=O)C(O)C1c1ccc(O)cc1', 'CC(C)=CCc1c(O)cc(OC)c2c1OC(c1ccc(O)cc1)C(O)C2=O', 'c1c(O)ccc(C2C(O)C(=O)c3c(OC)cc(O)c(CC=C(C)C)c3O2)c1', 'CC(C)=CCc1c(O)cc(OC)c2c1OC(c1ccc(O)cc1)C(O)C2=O', 'O=C1C(O)C(c2ccc(O)cc2)Oc2c(CC=C(C)C)c(O)cc(OC)c21', 'C(Cc1c2c(c(OC)cc1O)C(=O)C(O)C(c1ccc(O)cc1)O2)=C(C)C', 'COc1cc(O)c(CC=C(C)C)c2c1C(=O)C(O)C(c1ccc(O)cc1)O2', 'c1(O)ccc(C2Oc3c(CC=C(C)C)c…	1
challenge-018	POSITIVE	696	11.6	383.2	19	CC(=CCC/C(=C/CC[C@]1(C)[C@@H](C)c2c(c3ccc(cc3oc2=O)O)O1)/C)C	challenge-018	C24H30O4	[123.1168, 137.0237, 179.0331, 191.0338, 205.0499, 217.0512, 219.0659, 231.0644, 233.0816, 245.0816, 247.0965, 257.0812, 259.0955, 271.0972, 273.1121, 301.1443, 315.1578, 327.1592, 383.2226]	['C(/C=C(/CCC=C(C)C)C)C[C@]1(C)[C@@H](C)c2c(c3c(cc(O)cc3)oc2=O)O1', 'C(C/C=C(/CCC=C(C)C)C)[C@@]1(C)Oc2c(c(=O)oc3cc(O)ccc32)[C@@H]1C', 'C/C(=C\\CC[C@]1(C)[C@@H](C)c2c(c3c(oc2=O)cc(O)cc3)O1)CCC=C(C)C', '[C@@H]1(C)[C@@](C)(CC/C=C(\\C)CCC=C(C)C)Oc2c1c(=O)oc1cc(O)ccc21', 'O1[C@](C)(CC/C=C(\\C)CCC=C(C)C)[C@@H](C)c2c(=O)oc3c(ccc(O)c3)c21', 'O=c1c2c(c3ccc(O)cc3o1)O[C@](C)(CC/C=C(\\C)CCC=C(C)C)[C@H]2C', '…	1
challenge-019	POSITIVE	108	1.8	176.1	8	C(CC(C(=O)O)O)CNC(=N)N	challenge-019	C6H13N3O3	[60.0583, 70.0662, 71.0501, 117.0566, 130.0988, 134.0833, 159.0773, 176.1035]		0
challenge-020	POSITIVE	348	5.8	220.1	19	C1CC(=O)N2CCc3cc(c(cc3C12)O)O	challenge-020	C12H13NO3	[91.0532, 115.0555, 119.0489, 127.0591, 128.0602, 129.0727, 137.0596, 143.048, 157.0675, 160.0489, 161.063, 162.0558, 164.0724, 172.0748, 175.0753, 200.0717, 201.0797, 218.0817, 220.0974]	['C1N2C(=O)CCC2c2cc(O)c(O)cc2C1', 'C1(=O)N2CCc3c(cc(O)c(O)c3)C2CC1', 'C1CN2C(=O)CCC2c2c1cc(O)c(O)c2', 'c12cc(O)c(O)cc1CCN1C2CCC1=O', 'c1c2c(cc(O)c1O)C1CCC(=O)N1CC2', 'Oc1cc2c(cc1O)C1N(CC2)C(=O)CC1', 'C1N2C(CCC2=O)c2cc(O)c(O)cc2C1', 'C1(=O)CCC2c3cc(O)c(O)cc3CCN12', 'c1(O)c(O)cc2c(c1)CCN1C(=O)CCC21', 'C1(=O)N2CCc3c(cc(O)c(O)c3)C2CC1', 'C1N2C(c3c(cc(O)c(O)c3)C1)CCC2=O', 'C1(=O)N2C(c3c(cc(O)c(O)c3)CC…	1
challenge-021	POSITIVE	186	3.1	217.1	24	CC1c2c(ccc3c2c(CCN1C)c[nH]3)O	challenge-021	C13H16N2O	[129.0693, 131.0849, 141.0665, 143.073, 144.0524, 145.0879, 146.0609, 147.0677, 148.0772, 158.0918, 159.0757, 160.0773, 160.1123, 168.0807, 169.0893, 170.055, 171.068, 173.0829, 174.0914, 176.1065, 186.0911, 188.107, 202.1109, 217.1337]	['CN1C(C)c2c3c(c[nH]c3ccc2O)CC1', 'c12c3c(c(O)cc1)C(C)N(C)CCc3c[nH]2', 'Oc1c2c3c(c[nH]c3cc1)CCN(C)C2C', 'Oc1c2c3c(c[nH]c3cc1)CCN(C)C2C', 'c1cc2[nH]cc3c2c(c1O)C(C)N(C)CC3', 'c1c(O)c2c3c([nH]cc3CCN(C)C2C)c1', 'Oc1c2c3c(c[nH]c3cc1)CCN(C)C2C', '[nH]1c2c3c(c(O)cc2)C(C)N(C)CCc3c1', 'c1cc2c3c(c[nH]2)CCN(C)C(C)c3c1O', 'c1c(O)c2c3c([nH]cc3CCN(C)C2C)c1', 'C1N(C)C(C)c2c(O)ccc3c2c(c[nH]3)C1', 'N1(C)CCc2c[nH]…	1
challenge-022	POSITIVE	1506	25.1	381.2	30	CC1=CCC2C(C)(C)C(=O)CCC2(C)C1COc1ccc2ccc(=O)oc2c1	challenge-022	C24H28O4	[91.0537, 93.0689, 95.0821, 105.069, 107.0486, 107.0856, 109.0996, 117.0705, 119.0472, 119.0849, 121.1015, 131.0853, 133.1002, 135.1177, 145.0997, 147.1172, 159.1162, 161.1321, 163.0381, 163.1084, 173.1296, 175.0332, 175.151, 177.1277, 201.1647, 213.0539, 219.1747, 323.1619, 363.1978, 381.2084]	['c1cc(=O)oc2c1ccc(OCC1C3(C)C(C(C)(C)C(=O)CC3)CC=C1C)c2', 'c1cc(=O)oc2cc(OCC3C(C)=CCC4C3(C)CCC(=O)C4(C)C)ccc12', 'C1(C)=CCC2C(C)(C1COc1ccc3ccc(=O)oc3c1)CCC(=O)C2(C)C', 'c1cc(=O)oc2cc(OCC3C4(C)CCC(=O)C(C)(C)C4CC=C3C)ccc12', 'CC1(C)C2CC=C(C)C(COc3ccc4c(oc(=O)cc4)c3)C2(C)CCC1=O', 'CC12CCC(=O)C(C)(C)C1CC=C(C)C2COc1ccc2c(oc(=O)cc2)c1', 'CC1(C)C2CC=C(C)C(COc3ccc4ccc(=O)oc4c3)C2(C)CCC1=O', 'C(C1C2(C)C(C…	1
challenge-023	POSITIVE	582	9.7	314.2	8	C[N+]1(C)CCc2cc(c(cc2[C@H]1Cc1ccc(cc1)O)O)OC	challenge-023	C19H24NO3+	[58.0666, 107.0484, 175.0763, 237.0931, 239.104, 269.1193, 271.1338, 314.1749]		0
challenge-024	POSITIVE	108	1.8	166.1	10	C1CNCc2cc(c(cc12)O)O	challenge-024	C9H11NO2	[77.039, 91.056, 103.053, 119.0494, 121.0641, 123.0414, 131.0477, 137.0618, 149.0608, 166.0869]	['Oc1cc2c(cc1O)CCNC2', 'c12c(cc(O)c(O)c1)CCNC2', 'C1NCCc2c1cc(O)c(O)c2', 'c1(O)cc2c(cc1O)CCNC2', 'c12cc(O)c(O)cc1CNCC2', 'c12c(cc(O)c(O)c1)CNCC2', 'c1c2c(cc(O)c1O)CCNC2', 'c1(O)cc2c(cc1O)CNCC2', 'C1c2cc(O)c(O)cc2CNC1', 'c1c2c(cc(O)c1O)CCNC2', 'c1(O)cc2c(cc1O)CCNC2', 'c1c2c(cc(O)c1O)CNCC2', 'c1c(O)c(O)cc2c1CCNC2', 'N1Cc2c(cc(O)c(O)c2)CC1', 'c1(O)cc2c(cc1O)CCNC2', 'c1(O)cc2c(cc1O)CCNC2', 'c1c2c(cc(…	1
challenge-027	POSITIVE	228	3.8	370.2	17	CC(C)[C@H]1C(=O)O[C@@H]2CCN3CC=C(COC(=O)[C@@](CO)([C@]1(C)O)O)[C@H]23	challenge-027	C18H27NO7	[94.067, 120.0827, 121.0878, 122.0946, 138.0912, 180.1044, 198.1133, 208.1108, 222.151, 226.109, 250.1468, 266.1762, 282.1728, 324.184, 342.201, 352.1774, 370.1882]		0
challenge-028	POSITIVE			217.1	5	c1ccc2c(c1)c1CCNC(c1[nH]2)C(=O)O	challenge-028	C12H12N2O2	[115.0564, 142.0647, 160.0776, 170.0593, 188.0699]		0
challenge-032	POSITIVE	846	14.1	273.1	12	c1ccc(cc1)[C@@H]1[C@H](C(=O)c2c(cc(cc2O1)O)O)O	challenge-032	C15H12O5	[69.0314, 121.0258, 131.0886, 149.0221, 153.0164, 153.07, 181.0663, 199.0738, 209.0587, 227.0694, 255.0651, 273.076]	['c12c(O)cc(O)cc1O[C@H](c1ccccc1)[C@@H](O)C2=O', 'c1c([C@@H]2[C@@H](O)C(=O)c3c(O)cc(O)cc3O2)cccc1', '[C@H]1(c2ccccc2)Oc2c(c(O)cc(O)c2)C(=O)[C@@H]1O', '[C@@H]1(O)[C@@H](c2ccccc2)Oc2cc(O)cc(O)c2C1=O', 'Oc1c2c(cc(O)c1)O[C@H](c1ccccc1)[C@@H](O)C2=O', 'C1(=O)[C@H](O)[C@@H](c2ccccc2)Oc2c1c(O)cc(O)c2', 'c12c(c(O)cc(O)c1)C(=O)[C@H](O)[C@@H](c1ccccc1)O2', 'c1c(O)cc(O)c2c1O[C@H](c1ccccc1)[C@@H](O)C2=O', 'c…	1
challenge-033	POSITIVE	438	7.3	361.1	34	C[C@]12C3[C@@H](C[C@@H]4[C@@H](CC(=O)c5ccoc45)[C@]43C[C@@H]([C@]2(O)OC4)O)OC1=O	challenge-033	C19H20O7	[81.0329, 119.085, 123.0438, 135.0433, 135.0809, 145.0641, 147.0431, 169.0632, 211.1012, 223.1136, 225.1041, 227.1084, 235.1069, 237.0953, 239.1044, 241.1227, 251.1053, 253.1218, 255.103, 261.0891, 263.109, 267.1015, 269.1169, 271.1305, 279.1012, 281.1181, 285.1125, 287.1277, 297.112, 299.1286, 315.1211, 325.1094, 343.1193, 361.1292]	{'O=C(O)C1C2C=CC(C2)C2C1C1C(C(=O)O)C2C1C21OC1CC2C(=O)O', 'C=CC12C=CC(C(=O)O)(C(=O)OC)C1CCC2(C(=O)OC)c1ccco1', 'C=CC1=C(C(=O)O)C2C3C=CC(C(=O)OC)(CC2C1C(=O)OC)C31CO1', 'C=C(C(=O)OC)C12CC=C(C(=O)O)C1(CC(=O)OC)CC2c1ccco1', 'O=C(O)c1ccc2c(c1)C(CC(=O)O)CC21CC(C(=O)O)=CC(CO)C1', 'C#CC(=Cc1ccc(OC(C)=O)c(OC)c1)CCC(=O)OCC(=O)OC', 'O=C(O)C1=CC2C3CC(C(=O)O)C(C2C2C=CC12)C3(CC(=O)O)CC=O', 'O=C(O)C12CC(C(=O)O)=…	0.558991
challenge-034	POSITIVE	522	8.7	347.1	13	C[C@]12C3[C@@H](CC4C(CCC5=C4OCC5=O)[C@]43CC[C@@]2(O)OC4)OC1=O	challenge-034	C19H22O6	[147.0452, 225.1116, 229.1284, 239.1405, 243.1334, 257.152, 267.1365, 273.1476, 285.1495, 303.1583, 311.1252, 329.1352, 347.149]		0
challenge-035	POSITIVE	1404	23.4	391.2	12	C/C=C(/C)\C(=O)O[C@@]1(C)[C@@H]2CC[C@]3(C)[C@@H](CC=C(C)[C@H]3C2OC1=O)OC(=O)C	challenge-035	C22H30O6	[119.0829, 142.0776, 145.0995, 149.0196, 157.0994, 159.1067, 170.1039, 185.1317, 187.1269, 195.1145, 213.1261, 231.1369]		0
challenge-036	POSITIVE	918	15.3	324.1	14	c1cc2c(c3CN4CCc5cc6c(cc5C4Cc13)OCO6)OCO2	challenge-036	C19H17NO4	[91.055, 119.0495, 149.0601, 174.0553, 176.0703, 176.9697, 188.0716, 219.084, 249.0925, 265.0868, 277.0869, 295.0957, 307.0981, 324.1232]	['C1c2cc3c(cc2C2N(Cc4c(ccc5c4OCO5)C2)C1)OCO3']	1
challenge-037	POSITIVE	1368	22.8	399.2	19	CC(=C1CC[C@H](C)[C@](C)(COc2ccc3ccc(=O)oc3c2)[C@@H]1CCC(=O)O)C	challenge-037	C24H30O5	[93.0698, 95.0856, 107.0843, 107.0852, 121.1005, 123.1185, 149.1001, 163.0338, 163.1106, 167.1073, 181.1236, 189.0547, 201.1638, 219.1753, 237.1834, 339.1659, 363.1784, 381.205, 399.2206]	['c12ccc(OC[C@@]3(C)[C@@H](C)CCC(=C(C)C)[C@H]3CCC(=O)O)cc1oc(=O)cc2', '[C@@H]1(C)[C@](C)(COc2cc3c(ccc(=O)o3)cc2)[C@H](CCC(=O)O)C(=C(C)C)CC1', 'C1(=C(C)C)[C@@H](CCC(=O)O)[C@@](C)(COc2cc3oc(=O)ccc3cc2)[C@@H](C)CC1', 'C([C@@]1(C)[C@@H](C)CCC(=C(C)C)[C@H]1CCC(O)=O)Oc1cc2oc(=O)ccc2cc1', 'O=C(CC[C@H]1[C@@](C)(COc2ccc3c(oc(=O)cc3)c2)[C@@H](C)CCC1=C(C)C)O', 'C1[C@H](C)[C@@](COc2cc3oc(=O)ccc3cc2)(C)[C@H](…	1
challenge-041	POSITIVE	1056	17.6	366.2	9	Cc1c2ccc(c(c2c[n+]2CCc3cc(c(cc3c12)OC)OC)OC)OC	challenge-041	C22H24NO4+	[305.1418, 308.1294, 321.136, 322.1445, 334.143, 336.124, 350.1388, 351.1467, 366.1696]	{'COc1cc2c(cc1OC)C[n+]1c(C)cc3cc(OC)c(OC)cc3c1C2', 'COc1cc2c(cc1OC)[n+]1c(C)cc3cc(OC)c(OC)cc3c1CC2', 'COc1cc2c(cc1OC)c1cc3c(cc1c(OC)c2OC)C[N+](C)=C3C', 'COc1cc2c(ccc3c4c(cc(OC)c(OC)c42)CC[N+]3(C)C)c1C=O', 'CC[n+]1c(C)c2ccc3c(OC)c4ccc(OC)c(OC)c4c(OC)c2c1-3', 'COc1cc2c3c(cc4cc(OC)c(OC)cc4c3c1OC)[N+](C)(C)C=C2', 'COc1cc2c(cc1OC)c1ccc3c(c1[N+](C)=O)OC(C)(C)C3(C)C=C2', 'COc1cc2c(cc1OC)C(C)[n+]1cc3cc(O…	0.645302
challenge-042	POSITIVE	108	1.8	231.1	14	CC(=NC(CCCCNC(=N)N)C(=O)O)O	challenge-042	C9H18N4O3	[84.0814, 109.0759, 126.0994, 127.0872, 128.071, 129.1009, 130.0884, 144.1091, 168.1116, 171.1133, 172.1078, 213.1262, 214.1191, 231.1459]		0
challenge-043	POSITIVE	630	10.5	295.1	12	CN1CCc2c[nH]c3ccc(c(c23)C1c1ccc(cc1)O)O	challenge-043	C18H18N2O2	[107.0484, 146.0582, 148.0744, 158.0593, 160.0742, 189.1009, 201.1017, 238.0863, 252.1016, 264.1028, 266.1181, 295.1435]	['c1c(O)ccc(C2N(C)CCc3c4c2c(O)ccc4[nH]c3)c1', 'c1c(O)ccc(C2c3c(O)ccc4[nH]cc(c34)CCN2C)c1', 'c1(O)ccc(C2c3c4c(ccc3O)[nH]cc4CCN2C)cc1']	1
challenge-044	POSITIVE	108	1.8	154.1	5	C1CCN2C(C1)C(=NC2=N)O	challenge-044	C7H11N3O	[56.052, 84.0805, 112.0757, 126.1034, 154.0966]	['OC1=NC(=N)N2CCCCC12', 'C1CCCN2C1C(O)=NC2=N', 'C1(O)=NC(=N)N2CCCCC12', 'C1CN2C(=N)N=C(O)C2CC1']	1
challenge-045	POSITIVE	168	2.8	450.2	14	COc1cc(ccc1O[C@H]1[C@H](C([C@@H](C(CO)O1)O)O)O)C1c2cc(c(cc2CCN1)O)O	challenge-045	C22H27NO9	[107.0495, 118.0646, 137.0603, 146.0611, 152.0717, 164.0703, 211.0831, 221.0619, 225.0913, 239.0729, 253.0885, 271.0974, 288.1227, 450.1791]		0
challenge-134	POSITIVE	986.5	16.44	287.091	12	c1c(c(c2c(c1)[C@H]1[C@@H](CO2)c2c(O1)cc(cc2)O)O)OC	challenge-134	C16H14O5	[123.0441, 124.046, 147.0449, 183.5081, 191.0165, 191.5201, 226.0569, 248.0009, 255.068, 263.9725, 270.0529, 287.0914]		0
challenge-136	POSITIVE	1381.1	23.02	245.117	14	c1c(cc(cc1O)CCc1cccc(c1)O)OC	challenge-136	C15H16O3	[91.0529, 107.0511, 121.0648, 137.06, 138.0632, 151.0758, 152.0738, 170.0253, 170.5296, 213.0906, 226.0943, 227.0947, 241.0877, 245.1171]	['c1c(CCc2cccc(O)c2)cc(O)cc1OC', 'O(c1cc(O)cc(CCc2cccc(O)c2)c1)C', 'Oc1cccc(CCc2cc(O)cc(OC)c2)c1', 'Oc1cccc(CCc2cc(O)cc(OC)c2)c1']	1
challenge-140	POSITIVE	238	3.97	288.123	20	c12c(cc3c(c1)CN1C4C(=CC(C(C4)O)O)C3C1)OCO2	challenge-140	C16H17NO4	[114.0903, 146.0609, 153.0708, 161.0543, 173.0599, 174.0576, 183.0813, 211.0749, 212.0785, 213.0914, 226.0885, 227.0793, 240.1024, 241.0879, 244.1001, 253.0964, 254.095, 270.1148, 271.1146, 288.1228]	{'O=C(O)c1ccc2cc3c(cc2c1)CN(CCO)CCO3', 'C=CC1(CO)Cc2cccc3c2C1(OC(C)=O)C(=CN)O3', 'O=CNc1cc(O)c2cc(C(C)=O)ccc2c1CCCO', 'C=CCc1cc(C(=O)OC)c(OC)c(-n2cccc2)c1O', 'O=C(CO)c1cc(CCO)c(C(C)=O)c(-n2cccc2)c1', 'C=CC1(COC)C(=O)C(C(N)=O)=Cc2ccc(OC)cc21', 'O=C(O)c1cc(CO)c2ccc3c(c2c1)CC(CO)CN3', 'CC(=O)c1cc(CO)c(CO)c2ccc(C(C)=O)c(N)c12', 'C=CC1(CCO)NC(=O)C(C(=O)OC)=C1c1ccccc1', 'O=CNc1cc(C(CO)=CCO)cc2ccc(CO)cc…	0.561202
challenge-142	POSITIVE	293	4.88	409.113	36	O[C@H]1[C@@H](O[C@@H]([C@@H](O)[C@@H]1O)CO)c1c(cc(c(c1O)C(=O)c1ccc(cc1)O)O)O	challenge-142	C19H20O10	[121.0298, 130.1553, 177.019, 195.0309, 231.0288, 232.0256, 233.0381, 247.063, 249.0441, 259.061, 260.061, 261.0417, 271.0621, 272.0607, 279.0502, 289.0718, 290.074, 297.0611, 313.0713, 314.0751, 325.072, 326.0761, 337.0723, 338.0707, 343.0775, 355.0819, 356.0842, 373.0919, 374.0951, 391.1021, 392.1058, 392.5232, 393.112, 394.088, 402.0064, 409.1133]	['Oc1cc(O)c([C@@H]2O[C@H](CO)[C@@H](O)[C@H](O)[C@H]2O)c(O)c1C(c1ccc(O)cc1)=O']	1
challenge-144	POSITIVE	1758.7	29.31	269.081	11	C\1(=C(/c2ccccc2)\O)/Oc2c(C1=O)ccc(c2)OC	challenge-144	C16H12O4	[77.0334, 105.0326, 135.0447, 163.0398, 180.0584, 182.5139, 191.0326, 192.0385, 208.0536, 223.0761, 251.0715, 269.0799]	['O=C1c2c(cc(OC)cc2)O/C1=C(\\c1ccccc1)O', 'c1cccc(/C(=C2\\Oc3cc(OC)ccc3C2=O)O)c1', 'O/C(c1ccccc1)=C1\\C(=O)c2ccc(OC)cc2O1', 'O/C(c1ccccc1)=C1\\C(=O)c2ccc(OC)cc2O1', 'O(C)c1ccc2c(c1)O/C(=C(\\c1ccccc1)O)C2=O', 'c12c(ccc(OC)c1)C(=O)/C(=C(/c1ccccc1)O)O2', 'c1c(OC)ccc2c1O/C(=C(\\c1ccccc1)O)C2=O', 'C(\\O)(=C1\\C(=O)c2c(cc(OC)cc2)O1)c1ccccc1', 'O1/C(=C(\\c2ccccc2)O)C(=O)c2ccc(OC)cc21', 'O/C(=C1/Oc2c(ccc…	1
challenge-146	POSITIVE	502.2	8.37	359.134	38	O([C@@H]1O[C@@H]([C@@H](O)[C@H](O)[C@H]1O)CO)c1cc(ccc1CCC(=O)O)OC	challenge-146	C16H22O9	[55.0148, 109.0605, 137.059, 138.0612, 151.0711, 161.0504, 179.0697, 179.665, 179.8556, 180.0741, 180.3317, 180.6595, 181.0776, 191.0623, 197.0808, 197.7647, 198.0838, 198.337, 199.0723, 203.0678, 204.0664, 216.9809, 221.0739, 245.082, 246.0797, 252.9935, 257.996, 263.0898, 264.102, 275.0912, 292.0043, 294.033, 305.1004, 306.1093, 310.0132, 323.1101, 341.1272, 359.1324]		0
challenge-147	POSITIVE	286.2	4.77	318.17	14	[C@H]12c3c(CN4[C@@H]1C(=C[C@@H]([C@H]2O)OC)CC4)cc(c(c3)OC)OC	challenge-147	C18H23NO4	[110.059, 138.0911, 163.0734, 193.087, 237.1158, 254.1191, 258.1474, 266.1174, 268.1351, 269.1385, 271.1224, 286.1442, 287.1493, 318.168]		0
challenge-148	POSITIVE	662.4	11.04	328.154	67	c1(c(c2c3c(c1)CCNC3Cc1c2cc(c(c1)O)OC)OC)OC	challenge-148	C19H21NO4	[251.1063, 253.0868, 265.083, 266.0929, 266.8436, 267.0977, 268.105, 269.1075, 277.0804, 278.1316, 279.1025, 279.6565, 280.11, 280.8412, 281.1046, 281.4252, 281.6687, 281.92, 282.1015, 282.3435, 282.5196, 282.9789, 283.0998, 283.3522, 283.6503, 284.1084, 295.0984, 295.7747, 296.105, 297.1098, 297.6181, 298.2529, 298.8174, 299.1226, 299.6463, 310.579, 310.6394, 310.8759, 310.9501, 311.1273, 311.38…	['c12c(cc(OC)c(O)c1)-c1c3c(cc(OC)c1OC)CCNC3C2', 'N1C2c3c(cc(OC)c(OC)c3-c3cc(OC)c(O)cc3C2)CC1', 'C1Cc2c3c(c(OC)c(OC)c2)-c2c(cc(O)c(OC)c2)CC3N1', 'c1(OC)c(OC)c2c3c(c1)CCNC3Cc1c-2cc(OC)c(O)c1', 'N1CCc2cc(OC)c(OC)c3c2C1Cc1c-3cc(OC)c(O)c1']	1
challenge-154	POSITIVE	351.4	5.86	415.123	30	[C@H]1(OC=C2[C@@H]3[C@H]1C(=C[C@@H]3OC2=O)COC(=O)C)O[C@@H]1O[C@@H]([C@H]([C@@H]([C@H]1O)O)O)CO	challenge-154	C18H22O11	[79.0572, 91.0518, 92.0308, 92.0658, 119.0491, 120.0503, 123.0372, 131.0405, 147.0441, 148.0474, 149.061, 165.0577, 175.0399, 176.0423, 193.0505, 194.058, 235.0629, 236.0623, 253.072, 254.0657, 254.0855, 305.9846, 306.9849, 324.0032, 337.0874, 348.0216, 379.101, 389.9994, 397.1078, 415.1214]		0
challenge-156	POSITIVE	1184.5	19.74	301.071	18	c1(c(c(c2c(c1)oc(cc2=O)c1ccc(cc1)OC)O)O)O	challenge-156	C16H12O6	[190.5077, 190.9923, 191.5003, 198.0023, 198.5094, 258.0542, 282.056, 283.0607, 285.0444, 286.0446, 286.6536, 287.0538, 287.2489, 288.3121, 288.5453, 288.8352, 290.3397, 301.0709]	{'CC1(C)Cc2c(c(=O)c3c(o2)C(=O)C2=C(O3)C(=O)CC2=O)C1', 'Cc1cc(C)c2c(c1)C(=O)c1c(O)c(O)c(O)c(O)c1C2=O', 'CC(=O)c1c(O)cc2c(c1O)C(=O)c1c(O)cc(O)cc1C2', 'Cc1cc(=O)oc2c1C(=O)c1c(O)c(C)c(O)c(C)c1C2=O', 'CC(=O)c1c(C)cc2c(c1O)oc(=O)c1c(C)oc(=O)cc12', 'COc1cc(O)c2c(c1)C(=O)c1c(O)cc(C(C)=O)c(O)c1-2', 'CC(=O)c1c(O)c(C)c(O)c2c(=O)c3cccc(O)c3oc12', 'CC(=O)c1c(O)cc2oc3cc(O)cc(O)c3c(=O)c2c1C', 'Cc1cc2c(c(O)c1C)C…	0.532374
challenge-158	POSITIVE	1184.4	19.74	301.071	14	c1(c(c(c2c(c1)oc(cc2=O)c1ccc(cc1)O)O)OC)O	challenge-158	C16H12O6	[190.9815, 190.9957, 198.0072, 198.5105, 256.0639, 282.0561, 283.0597, 285.0439, 285.5798, 286.0464, 287.0516, 287.3152, 289.6131, 301.0705]	['c1cc(O)ccc1-c1cc(=O)c2c(o1)cc(O)c(OC)c2O', 'c1c(-c2ccc(O)cc2)oc2cc(O)c(OC)c(O)c2c1=O', 'c1cc(O)ccc1-c1oc2cc(O)c(OC)c(O)c2c(=O)c1', 'c1cc(O)ccc1-c1cc(=O)c2c(cc(O)c(OC)c2O)o1', 'c1(-c2ccc(O)cc2)cc(=O)c2c(O)c(OC)c(O)cc2o1', 'COc1c(O)cc2c(c(=O)cc(-c3ccc(O)cc3)o2)c1O', 'Oc1cc2oc(-c3ccc(O)cc3)cc(=O)c2c(O)c1OC', 'c1(O)c2c(oc(-c3ccc(O)cc3)cc2=O)cc(O)c1OC', 'c1c(O)c(OC)c(O)c2c(=O)cc(-c3ccc(O)cc3)oc12', …	1
challenge-159	POSITIVE	1408.1	23.47	329.175	64	c1c(ccc(c1)CCC(CC(=O)CCc1ccc(cc1)O)OC)O	challenge-159	C20H24O4	[77.0334, 79.0487, 105.0672, 106.0724, 107.048, 107.454, 107.6758, 108.049, 121.0658, 133.064, 133.5583, 133.7378, 133.7741, 134.0676, 134.2178, 147.0804, 149.0595, 150.0655, 159.0841, 161.9867, 162.0756, 165.0911, 166.0765, 175.5279, 177.0889, 177.9964, 178.0948, 181.0847, 184.0437, 185.0924, 189.0808, 190.075, 191.1071, 192.1068, 199.0777, 203.0192, 203.069, 219.0108, 221.0148, 237.0341, 245.02…	['c1(O)ccc(CCC(CC(OC)CCc2ccc(O)cc2)=O)cc1', 'c1(CCC(CC(=O)CCc2ccc(O)cc2)OC)ccc(O)cc1', 'COC(CC(CCc1ccc(O)cc1)=O)CCc1ccc(O)cc1']	1
challenge-160	POSITIVE	305.3	5.09	433.17	24	c1cccc(c1)CO[C@@H]1O[C@@H]([C@H]([C@@H]([C@H]1O)O)O)CO[C@@H]1O[C@@H]([C@H]([C@@H]([C@H]1O)O)O)CO	challenge-160	C19H28O11	[69.0154, 85.0222, 91.0517, 109.0176, 127.0377, 145.0526, 163.0571, 235.0867, 235.1062, 253.1066, 271.117, 272.0251, 272.124, 275.9936, 276.9984, 278.9958, 279.0149, 325.114, 326.1114, 337.0076, 378.0271, 379.0309, 396.0374, 433.174]		0
challenge-161	POSITIVE	1537.1	25.62	275.091	72	[C@@H]1([C@@H](O1)/C(=C\1/C(=CC(=O)O1)OC)/OC)c1ccccc1	challenge-161	C15H14O5	[77.0349, 92.0592, 121.0643, 121.4621, 121.7364, 122.0697, 122.2516, 122.5439, 126.0448, 127.0519, 141.0721, 153.0389, 154.0082, 154.0443, 155.0527, 168.0567, 169.0661, 169.5093, 177.5309, 183.0395, 185.0658, 185.5206, 186.0682, 186.5187, 187.0756, 188.0768, 197.0651, 198.0668, 201.0742, 202.0628, 203.0746, 210.0246, 211.0404, 212.0461, 213.0601, 214.0627, 215.0727, 215.6472, 216.078, 216.1021, 2…	['CO/C(=C1/OC(=O)C=C1OC)[C@@H]1O[C@H]1c1ccccc1', 'c1cccc([C@@H]2O[C@H]2/C(=C2\\OC(=O)C=C2OC)OC)c1', '[C@H]1(c2ccccc2)[C@H](/C(OC)=C2/C(OC)=CC(=O)O2)O1', 'c1ccc([C@@H]2O[C@H]2/C(OC)=C2/C(OC)=CC(=O)O2)cc1', 'c1ccc([C@@H]2O[C@H]2/C(OC)=C2\\OC(=O)C=C2OC)cc1', 'O(C)/C(=C1/OC(=O)C=C1OC)[C@@H]1O[C@H]1c1ccccc1', '[C@H]1(c2ccccc2)[C@H](/C(OC)=C2\\OC(=O)C=C2OC)O1', 'c1c([C@H]2[C@H](/C(OC)=C3/C(OC)=CC(=O)O3…	1
challenge-162	POSITIVE	1279	21.32	345.133	80	C1=C2C(=C)CC3C(C(CC(C1=O)(C)O2)OC(=O)C(=C)C)C(=C)C(=O)O3	challenge-162	C19H20O6	[69.0305, 77.0322, 95.0468, 96.0448, 105.0684, 111.0409, 121.0638, 123.0397, 129.0697, 137.0601, 141.0687, 145.073, 146.0715, 152.0625, 154.0782, 157.0671, 157.0928, 161.0615, 162.0672, 163.076, 165.0613, 167.0861, 168.0949, 169.0998, 170.0734, 171.0808, 173.0918, 175.1057, 181.0591, 181.9937, 182.0635, 183.9872, 185.094, 186.0956, 187.0941, 187.1129, 189.0921, 195.0865, 197.0998, 197.1128, 199.0…	['O1C2(C)CC(OC(=O)C(C)=C)C3C(CC(=C)C1=CC2=O)OC(=O)C3=C', 'C1(=C)C2=CC(=O)C(C)(O2)CC(OC(=O)C(C)=C)C2C(OC(=O)C2=C)C1', 'C(C(OC1C2C(=C)C(=O)OC2CC(=C)C2=CC(=O)C(C)(C1)O2)=O)(=C)C', 'C12CC(=C)C3=CC(=O)C(C)(O3)CC(OC(=O)C(C)=C)C1C(=C)C(=O)O2', 'C1(=C)CC2C(C(OC(=O)C(C)=C)CC3(C)OC1=CC3=O)C(=C)C(=O)O2', 'CC(C(OC1C2C(=C)C(=O)OC2CC(=C)C2=CC(=O)C(C)(C1)O2)=O)=C', 'C12C(=C)C(=O)OC1CC(=C)C1=CC(=O)C(C)(O1)CC2OC(…	1
challenge-163	POSITIVE	478.4	7.97	479.29	76	c1(c(cc2c(c1)CCN1C2CC(C(C1)CC)CC1=NCCc2c1cc(c(c2)OC)OC)OC)OC	challenge-163	C29H38N2O4	[80.0484, 91.0525, 105.0689, 110.0954, 111.0897, 121.0649, 133.0653, 134.0719, 146.088, 150.0664, 150.7533, 151.2265, 165.0898, 165.3365, 165.6389, 166.0953, 166.218, 166.4586, 166.5204, 166.7159, 166.7426, 167.0956, 167.3264, 167.6486, 191.0945, 205.9768, 206.1176, 206.2714, 206.5815, 206.6083, 206.8304, 206.8501, 207.1222, 207.2696, 207.3632, 207.5359, 207.6571, 208.1305, 208.3527, 208.4407, 20…	['C1C(CC2=NCCc3cc(OC)c(OC)cc32)C(CC)CN2C1c1cc(OC)c(OC)cc1CC2']	1
challenge-164	POSITIVE	835.8	13.93	267.159	73	C1C(C(=C2C(C1)(CCC1(C2OC(=O)C1C)O)C)C)O	challenge-164	C15H22O4	[73.0589, 91.0514, 93.0696, 97.0656, 105.0687, 107.0817, 111.0699, 116.0623, 117.0663, 119.0834, 129.0687, 131.0825, 132.0807, 133.1002, 134.1033, 142.078, 143.0849, 145.1007, 147.1164, 148.1147, 149.1174, 150.5498, 156.0884, 157.0998, 158.0978, 159.1162, 161.1259, 170.1051, 171.1145, 175.1142, 176.1145, 185.13, 186.135, 187.1477, 189.1262, 193.1179, 203.1429, 203.5852, 203.8315, 204.1491, 204.33…	['O1C(=O)C(C)C2(O)C1C1=C(C)C(O)CCC1(C)CC2', 'C1(O)CCC2(C)CCC3(O)C(OC(=O)C3C)C2=C1C', 'C1(C)=C2C3C(O)(C(C)C(=O)O3)CCC2(C)CCC1O', 'O=C1C(C)C2(O)CCC3(C)C(=C(C)C(O)CC3)C2O1']	1
challenge-166	POSITIVE	1749.2	29.15	355.154	61	c12c(c(c(cc1OC(CC2=O)c1ccc(cc1)OC)O)CC=C(C)C)O	challenge-166	C21H22O5	[53.042, 55.016, 68.9983, 79.0244, 81.0374, 105.0692, 109.0153, 121.065, 124.0229, 135.0837, 137.0271, 153.0399, 161.0608, 163.0492, 164.8756, 165.0196, 165.2271, 165.6423, 166.023, 166.1858, 166.7193, 167.0277, 167.3146, 167.9642, 191.0347, 192.0436, 193.0126, 197.0112, 197.5181, 198.5212, 205.0577, 219.0728, 221.084, 222.0956, 225.5515, 239.0666, 258.0844, 281.085, 287.1033, 298.6683, 298.96, 2…	['C1C(c2ccc(OC)cc2)Oc2cc(O)c(CC=C(C)C)c(O)c2C1=O', 'c1cc(C2Oc3c(c(O)c(CC=C(C)C)c(O)c3)C(=O)C2)ccc1OC', 'c1cc(OC)ccc1C1Oc2c(c(O)c(CC=C(C)C)c(O)c2)C(=O)C1', 'O1C(c2ccc(OC)cc2)CC(=O)c2c(O)c(CC=C(C)C)c(O)cc21', 'O1c2c(c(O)c(CC=C(C)C)c(O)c2)C(=O)CC1c1ccc(OC)cc1', 'c1c2c(c(O)c(CC=C(C)C)c1O)C(=O)CC(c1ccc(OC)cc1)O2', 'c1cc(OC)ccc1C1CC(=O)c2c(cc(O)c(CC=C(C)C)c2O)O1', 'c1c(C2CC(=O)c3c(O)c(CC=C(C)C)c(O)cc3O…	1
challenge-167	POSITIVE	562.4	9.37	332.149	63	c12c(cc3c(c1)C14C(OC3)(CN(C1CC(C=C4)OC)C)O)OCO2	challenge-167	C18H21NO5	[94.066, 181.0635, 184.0834, 204.0713, 211.0766, 212.0806, 214.0908, 216.102, 230.0819, 234.0926, 240.7338, 241.1033, 243.1034, 256.086, 256.1159, 257.0887, 257.6147, 264.1038, 265.1082, 271.1206, 282.1176, 283.1161, 283.7283, 284.1239, 284.6665, 286.145, 313.503, 313.5792, 313.6853, 313.8666, 313.9868, 314.1393, 314.3524, 314.3742, 314.6422, 314.8678, 314.9451, 315.1435, 315.3129, 315.353, 315.5…		0
challenge-168	POSITIVE	1659.5	27.66	337.237	97	C1CC(C2C(C1)(C(C(=C)CC2)CCC(CC(=O)O)C)C)(C(=O)O)C	challenge-168	C20H32O4	[81.0666, 95.0822, 96.0679, 97.093, 99.0801, 105.0716, 108.0909, 109.0997, 110.0945, 111.0931, 121.1009, 123.0966, 135.1072, 139.0941, 143.0996, 149.1293, 150.132, 157.1084, 159.1165, 163.1388, 164.1765, 175.1446, 176.1466, 177.1568, 178.1703, 181.1329, 191.1406, 193.5927, 194.5845, 195.1356, 195.5706, 199.1449, 203.1397, 208.6078, 209.1539, 210.1548, 216.5797, 217.1627, 217.5829, 221.1542, 222.1…	{'C=CC1CC2CCC1C(C)C2C1CCC(CO)(C(=O)OC)CC1O', 'CC12CCC3C(C1)C1CC(C(C)(CO)CO)C(C(=O)O)C3C1C2C', 'C#CCC1CCC(C)(C(O)(O)C(C(=O)O)C(C)C)CCC1C(=C)C', 'C=CCC1C=CC2CCC3C(C(O)C(CO)(CO)CO)CC1C23C', 'C#CC1(C)CCC(C(C)(C)C2CCC(C(=O)O)C(CO)(CO)C2)C1'}	0.605769
challenge-171	POSITIVE	1653.3	27.55	317.211	92	C1CC(C2C(C1)(C1=CC(=O)C(CC1CC2)(C=C)C)C)(C)C(=O)O	challenge-171	C20H28O3	[77.018, 81.0672, 91.0523, 95.0799, 97.0732, 105.0691, 106.0734, 107.0843, 108.0838, 109.1002, 110.0628, 111.0816, 113.0858, 121.1008, 123.1068, 131.0854, 133.092, 134.0986, 135.1054, 137.0948, 145.1012, 147.1055, 149.0985, 150.0996, 151.1066, 157.1015, 159.1169, 161.1287, 163.1118, 164.0958, 167.0995, 169.101, 171.1197, 172.1143, 173.1327, 174.1237, 175.1241, 183.1157, 183.5755, 184.5879, 185.59…	{'C=C1CC23CCC1CC2C1(C)CCC(C(=C)OC)C1C3C(=O)O', 'C=C1CC2CC1C1CC2C2(C)CCC1(C(=O)O)C2CC=CCO', 'O=C(O)C1(CCO)CC2CC3C4CCC5CC=CC5C4CC3C21', 'C=CC1CCC2C3CCC4C(COC)C(=O)CC1C2C4C3C=O', 'C=C1C2CCC1C1C2CCC23CC1CC2CC3(C)COC(=O)O', 'C1CCC23COC4(CCC5CC(=O)CCC5(C1)C42)CC1OC1C3', 'C=C1C2CCC3C(C2)C1C1CC2C(CCC32)C1C(=O)OCCO', 'C=C1C2CCC1C1C3CCC4C3C1C2CC4(CCO)CC(=O)O', 'O=C(O)C12C=CC(CCC1)C1CC=CC(CCCCCC=O)C12', 'C#…	0.615702
challenge-172	POSITIVE	1374.3	22.9	251.164	78	C12=CCC(C1CC1(C(=O)CC2(C1(CO)C)C)O)C	challenge-172	C15H22O3	[79.0509, 81.0665, 95.0546, 95.0816, 97.0668, 105.0699, 107.0831, 109.0949, 111.0804, 119.0843, 121.1009, 125.0845, 131.0845, 133.1001, 135.0855, 139.0773, 145.1014, 146.1029, 147.1117, 149.0843, 153.084, 156.0888, 157.0977, 158.5518, 159.1156, 160.1133, 161.0897, 161.1163, 163.092, 164.5501, 165.5683, 167.0799, 171.1175, 173.1294, 173.5562, 174.1223, 174.5622, 175.1065, 175.5487, 176.102, 177.07…	['C12=CCC(C)C1CC1(O)C(=O)CC2(C)C1(CO)C', 'C(O)C1(C)C2(C)C3=CCC(C)C3CC1(O)C(=O)C2', 'C1(CO)(C)C2(C)CC(=O)C1(O)CC1C(C)CC=C21', 'C1(C)C2C(=CC1)C1(C)C(CO)(C)C(O)(C2)C(=O)C1', 'C12(O)C(CO)(C)C(C)(C3=CCC(C)C3C1)CC2=O', 'C1C(C)C2CC3(O)C(C)(CO)C(C)(CC3=O)C2=C1', 'C1C2C(C)CC=C2C2(C)CC(=O)C1(O)C2(C)CO']	1
challenge-173	POSITIVE	1218.4	20.31	357.133	50	C1(C(C(C1C(=O)OC)c1ccc(cc1)O)C(=O)OC)c1ccc(cc1)O	challenge-173	C20H20O6	[85.0202, 91.0533, 105.0338, 107.0504, 113.0225, 120.0717, 171.0133, 172.0, 178.0631, 206.0123, 210.099, 212.0838, 231.0335, 236.0101, 236.0747, 237.0923, 238.092, 247.0765, 252.0988, 265.0881, 266.0942, 267.1084, 270.1077, 271.1171, 275.0745, 276.0687, 278.0005, 278.5303, 279.0064, 293.0831, 294.088, 295.0977, 311.0969, 324.6772, 324.9522, 325.1067, 325.7189, 326.1129, 326.3161, 326.5966, 326.62…	['c1c(C2C(C(=O)OC)C(c3ccc(O)cc3)C2C(=O)OC)ccc(O)c1', 'c1c(O)ccc(C2C(C(OC)=O)C(c3ccc(O)cc3)C2C(OC)=O)c1', 'COC(=O)C1C(c2ccc(O)cc2)C(C(=O)OC)C1c1ccc(O)cc1', 'c1cc(O)ccc1C1C(C(=O)OC)C(c2ccc(O)cc2)C1C(OC)=O', 'COC(=O)C1C(c2ccc(O)cc2)C(C(=O)OC)C1c1ccc(O)cc1', 'C1(c2ccc(O)cc2)C(C(=O)OC)C(c2ccc(O)cc2)C1C(OC)=O', 'c1cc(C2C(C(=O)OC)C(c3ccc(O)cc3)C2C(=O)OC)ccc1O', 'O=C(OC)C1C(c2ccc(O)cc2)C(C(=O)OC)C1c1ccc(…	1
challenge-174	POSITIVE	269.4	4.49	453.139	64	c1(c(ccc(c1O)C(=O)[C@@H](Cc1ccc(c(c1)O)O)O)O)[C@H]1[C@@H]([C@H]([C@@H]([C@H](O1)CO)O)O)O	challenge-174	C21H24O11	[123.0403, 135.0175, 135.0382, 153.0538, 163.0392, 177.0506, 191.0314, 193.0497, 209.0378, 219.0607, 233.0461, 237.0757, 245.037, 245.5316, 246.0297, 254.031, 259.0613, 263.0573, 269.0822, 270.0803, 285.0766, 287.0907, 291.087, 293.0771, 297.0772, 298.0793, 299.078, 300.0796, 311.0921, 313.0711, 315.0878, 316.089, 316.1113, 321.0786, 323.0766, 329.0871, 333.0981, 334.0987, 335.0964, 339.0868, 340…	{'C=C(C)C(=O)OCC1(OC(C)=O)C(=O)C(C)(OC)C(OC(=O)c2ccco2)C1OC(C)=O', 'C=C(C)C(=O)OC1C(OC(C)=O)C(OC(C)=O)C(C)(OC(C)=O)C1OC(=O)c1ccco1', 'C=C(C)C(=O)OC1C(OC(C)=O)C(C)(OC(C)=O)C(=O)C(O)C1c1ccc(O)c(O)c1O'}	0.535548
challenge-175	POSITIVE	379.3	6.32	405.139	56	C12(C(C(OC=C1C(=O)OC)OC1OC(C(C(C1O)O)O)CO)C(CC2=O)C)O	challenge-175	C17H24O11	[67.0504, 81.0666, 91.0508, 95.0463, 96.0469, 109.0634, 110.0704, 119.0478, 123.0313, 137.0578, 147.0454, 148.0467, 155.03, 165.0554, 166.0535, 175.0373, 176.0326, 193.0491, 193.7943, 193.8441, 194.0558, 194.2913, 194.7467, 195.0608, 197.0841, 207.0648, 207.5701, 207.7191, 207.8632, 208.072, 208.2919, 208.3539, 208.5244, 208.8728, 209.077, 225.0757, 225.6336, 225.9489, 226.0832, 226.3345, 226.643…		0
challenge-176	POSITIVE	518	8.63	267.159	52	C1(=C(C(C2C(C1)OC(=O)C2=C)O)C(CCCO)C)C	challenge-176	C15H22O4	[69.0555, 85.0572, 93.068, 105.0695, 117.0627, 119.0839, 128.0617, 129.068, 131.0812, 132.0909, 133.0837, 143.0768, 144.0876, 145.0955, 146.0879, 147.0806, 155.0833, 156.0902, 157.0892, 159.1195, 160.1166, 161.0558, 161.0951, 162.0726, 163.0634, 171.0974, 175.0786, 176.0755, 185.1328, 186.1374, 187.1433, 189.0918, 190.0844, 195.118, 196.0927, 203.143, 204.1463, 213.1278, 214.1263, 219.1366, 221.1…	['CC(C1=C(C)CC2C(C1O)C(=C)C(=O)O2)CCCO']	1
challenge-178	POSITIVE	1841.3	30.69	301.143	23	C/C=C/C#CC#C/C=C/C=C/C(CCOC(=O)C)OC(=O)C	challenge-178	C18H20O4	[65.0322, 121.028, 122.0184, 149.0225, 149.4641, 149.5526, 149.7577, 149.847, 150.0286, 150.3355, 151.0401, 205.088, 206.09, 219.9881, 221.984, 274.0991, 276.0575, 278.0451, 279.181, 279.6312, 280.1886, 285.1663, 301.1401]	['C(/C=C/C=C/C#CC#C/C=C/C)(CCOC(C)=O)OC(C)=O', 'C(CCOC(C)=O)(OC(C)=O)/C=C/C=C/C#CC#C/C=C/C', 'C(=C/C(CCOC(C)=O)OC(C)=O)\\C=C\\C#CC#C/C=C/C', 'C(/C=C/C=C/C(OC(C)=O)CCOC(C)=O)#CC#C/C=C/C', 'C/C=C/C#CC#C/C=C/C=C/C(OC(C)=O)CCOC(=O)C', 'C(CCOC(=O)C)(OC(=O)C)/C=C/C=C/C#CC#C/C=C/C', 'CC(=O)OC(CCOC(=O)C)/C=C/C=C/C#CC#C/C=C/C', 'C(CCOC(=O)C)(OC(=O)C)/C=C/C=C/C#CC#C/C=C/C', 'C(\\C)=C/C#CC#C/C=C/C=C/C(OC(=O…	1
challenge-181	POSITIVE	494.6	8.24	265.143	56	C1C(C(=C)CC2C(C(/C=C(/C1)\C)O)C(=C)C(=O)O2)O	challenge-181	C15H20O4	[67.0526, 81.0664, 91.0508, 93.0688, 95.0812, 105.0685, 107.081, 117.0636, 123.0353, 128.054, 129.0673, 131.0546, 131.08, 133.1005, 134.0958, 141.0675, 143.0796, 144.0909, 145.1004, 146.1012, 151.107, 152.0969, 153.0692, 155.0742, 156.0816, 157.091, 158.0768, 159.1034, 167.0752, 168.0713, 168.092, 173.1298, 174.1191, 183.1157, 184.1151, 185.1289, 187.0909, 189.0838, 193.0945, 201.128, 202.131, 20…	['OC1CC/C(C)=C/C(O)C2C(=C)C(=O)OC2CC1=C']	1
challenge-182	POSITIVE	377.8	6.3	283.154	53	C12=C(C(=O)OC1)CC(C1C(C2O)CC(C1)(C)CO)(C)O	challenge-182	C15H22O5	[81.0619, 91.0538, 105.0664, 129.0656, 131.0826, 143.0587, 143.0851, 145.1001, 155.0836, 156.0922, 157.0741, 157.0996, 158.1018, 159.1155, 161.0614, 168.0916, 170.1095, 171.1154, 173.06, 174.0608, 175.0778, 183.1164, 184.1198, 185.1306, 186.1337, 187.0758, 188.039, 188.0782, 199.1085, 201.1226, 202.1216, 203.1114, 211.1109, 212.1123, 217.1217, 219.1366, 220.1128, 229.1229, 229.7966, 230.1266, 230…		0
challenge-186	POSITIVE	1989.9	33.16	303.232	10	C1CC(C2C(C1)(C1=CCC(CC1CC2)(C=C)C)C)(C)C(=O)O	challenge-186	C20H30O2	[81.069, 105.0615, 175.1475, 201.1485, 241.1981, 257.2286, 258.2243, 285.2016, 287.1951, 303.2307]	['C1CC2(C)C3=CCC(C=C)(C)CC3CCC2C(C)(C(O)=O)C1', 'C1C2CC(C)(C=C)CC=C2C2(C)CCCC(C)(C(=O)O)C2C1', 'C12(C)C(CCC3CC(C)(C=C)CC=C13)C(C(O)=O)(C)CCC2', 'O=C(O)C1(C)C2C(C)(CCC1)C1=CCC(C=C)(C)CC1CC2', 'C1(C(=O)O)(C)CCCC2(C)C1CCC1CC(C)(C=C)CC=C21', 'C1C2(C)C3=CCC(C=C)(C)CC3CCC2C(C)(C(O)=O)CC1', 'O=C(O)C1(C)CCCC2(C)C3=CCC(C=C)(C)CC3CCC12', 'C1CC2CC(C)(C=C)CC=C2C2(C)CCCC(C(=O)O)(C)C12', 'CC1(C=C)CC=C2C(CCC3C2…	1
challenge-188	POSITIVE	1471.6	24.53	305.066	25	c1cc(c2c(c1O)c(=O)c1c(c(c(cc1O)O)OC)o2)OC	challenge-188	C15H12O7	[192.5001, 193.0063, 200.0008, 200.5072, 209.5152, 246.0121, 248.0298, 275.0208, 275.7483, 276.5729, 277.0316, 279.0989, 280.1084, 290.0393, 290.6515, 290.8505, 291.0476, 291.35, 291.5523, 291.7474, 292.0515, 292.8386, 293.0782, 300.9404, 305.0667]		0
challenge-189	POSITIVE	284.1	4.74	445.207	54	C1CC(C2C(C1O)(CC(C(C2O)C(=C)C(=O)OC)OC(=O)C(=C)C(CO)O)C)(CO)O	challenge-189	C21H32O10	[105.0684, 113.0653, 115.0576, 117.0686, 119.0815, 143.086, 145.0695, 147.078, 157.0953, 169.1008, 171.1181, 172.1103, 177.0782, 179.1048, 181.0987, 182.105, 183.1086, 189.1249, 199.1124, 200.0963, 200.1145, 201.0904, 201.1144, 203.1008, 209.0974, 215.1078, 217.1236, 218.1239, 227.1081, 228.1061, 231.1325, 241.118, 242.0692, 245.1187, 246.12, 247.1316, 259.1342, 260.136, 263.1262, 265.1446, 277.1…		0
challenge-190	POSITIVE	1846.8	30.78	317.211	23	[C@]12(C([C@@](C(=O)O)(CCC2)C)CCC(=C)[C@H]1CCc1cocc1)C	challenge-190	C20H28O3	[95.0593, 177.1673, 189.1309, 207.0348, 208.0374, 209.0159, 215.1862, 223.0715, 227.1881, 243.174, 253.1938, 254.19, 255.225, 261.1905, 269.1918, 281.0603, 282.0548, 283.0576, 297.1108, 298.112, 299.1953, 300.2045, 317.2092]		0
challenge-191	POSITIVE	578.1	9.63	164.071	21	c1cccc(c1)C1OC(=O)NC1	challenge-191	C9H9NO2	[77.032, 91.0539, 93.0681, 103.0538, 104.0589, 119.0711, 120.0797, 120.5378, 120.7538, 120.8413, 121.0841, 121.2273, 121.4504, 126.0738, 128.0494, 129.0502, 146.0602, 146.4959, 147.0631, 147.9997, 164.0704]	['C1(c2ccccc2)CNC(=O)O1', 'O1C(=O)NCC1c1ccccc1', 'C1C(c2ccccc2)OC(=O)N1']	1
challenge-192	POSITIVE	1793.6	29.89	325.143	57	c1c(ccc(c1O)C(=O)/C=C/c1ccc(cc1)OCC=C(C)C)O	challenge-192	C20H20O4	[81.0322, 91.2249, 107.0402, 123.0334, 137.0294, 137.5429, 138.0239, 147.0439, 148.0494, 163.0487, 169.062, 176.5185, 183.0773, 205.9801, 211.0758, 215.0745, 239.071, 239.0893, 240.0759, 241.1006, 242.0585, 255.092, 256.0836, 256.6505, 256.7688, 256.931, 257.081, 257.3519, 257.397, 257.6676, 257.8387, 257.9646, 258.085, 258.3818, 258.582, 258.674, 258.853, 258.9206, 259.0926, 259.3537, 259.4596, …	['O(CC=C(C)C)c1ccc(/C=C/C(c2c(O)cc(O)cc2)=O)cc1', 'c1(C(=O)/C=C/c2ccc(OCC=C(C)C)cc2)ccc(O)cc1O', 'c1cc(/C=C/C(=O)c2c(O)cc(O)cc2)ccc1OCC=C(C)C', 'c1c(O)cc(O)c(C(/C=C/c2ccc(OCC=C(C)C)cc2)=O)c1', 'c1(OCC=C(C)C)ccc(/C=C/C(=O)c2ccc(O)cc2O)cc1', 'c1cc(O)cc(O)c1C(/C=C/c1ccc(OCC=C(C)C)cc1)=O', 'Oc1ccc(C(=O)/C=C/c2ccc(OCC=C(C)C)cc2)c(O)c1', 'O=C(c1c(O)cc(O)cc1)/C=C/c1ccc(OCC=C(C)C)cc1', 'C(\\C(c1c(O)cc(O)…	1
challenge-193	POSITIVE	390.4	6.51	279.123	38	C12=C(C[C@@H]([C@@H]3[C@@H]([C@H]1C(=CC2=O)CO)OC(=O)[C@@H]3C)O)C	challenge-193	C15H18O5	[105.0691, 131.0852, 143.0836, 145.0765, 147.0723, 149.0968, 155.0799, 156.0942, 157.0913, 159.0794, 160.0836, 161.0815, 169.099, 170.094, 171.1016, 173.0876, 174.0616, 177.0772, 185.0932, 186.0755, 187.0791, 187.1044, 188.0974, 197.0963, 198.0971, 199.1041, 205.107, 215.1073, 216.1105, 225.09, 231.0983, 233.1158, 234.1079, 243.102, 244.1021, 261.1135, 262.1122, 279.122]	['C1(C)=C2C(=O)C=C(CO)[C@@H]2[C@H]2OC(=O)[C@H](C)[C@@H]2[C@@H](O)C1', 'O[C@H]1CC(C)=C2[C@@H]([C@H]3OC(=O)[C@H](C)[C@@H]31)C(CO)=CC2=O', 'C1(CO)=CC(=O)C2=C(C)C[C@H](O)[C@H]3[C@@H](C)C(=O)O[C@@H]3[C@@H]12']	1
challenge-194	POSITIVE	1906.2	31.77	341.175	88	c1(cc(cc2c1OCO2)CCc1ccc(cc1)OCC=C(C)C)OC	challenge-194	C21H24O4	[69.0611, 70.0784, 77.024, 93.0703, 107.0503, 119.0532, 121.0648, 131.0527, 133.0668, 145.0704, 149.0734, 165.056, 166.0606, 167.079, 175.1145, 176.1006, 179.0705, 180.0752, 182.0818, 187.1092, 189.129, 190.1232, 196.0856, 199.1022, 201.121, 202.1357, 209.0948, 211.0819, 213.0905, 223.0804, 227.1088, 233.1118, 235.1231, 241.0948, 243.1695, 243.1938, 245.1381, 253.0962, 254.0868, 255.1062, 256.100…	['c1(CCc2ccc(OCC=C(C)C)cc2)cc(OC)c2c(c1)OCO2', 'C(COc1ccc(CCc2cc(OC)c3c(c2)OCO3)cc1)=C(C)C', 'O1c2c(OC)cc(CCc3ccc(OCC=C(C)C)cc3)cc2OC1', 'C(Oc1ccc(CCc2cc3c(c(OC)c2)OCO3)cc1)C=C(C)C', 'O(c1ccc(CCc2cc3c(c(OC)c2)OCO3)cc1)CC=C(C)C', 'C(Cc1cc(OC)c2c(c1)OCO2)c1ccc(OCC=C(C)C)cc1', 'C(Oc1ccc(CCc2cc(OC)c3c(c2)OCO3)cc1)C=C(C)C', 'c1cc(CCc2cc(OC)c3c(c2)OCO3)ccc1OCC=C(C)C', 'O1c2c(OC)cc(CCc3ccc(OCC=C(C)C)cc3…	1
challenge-200	POSITIVE	1050.3	17.5	223.096	44	c1(c(c(cc(c1)/C=C/C=O)OC)OC)OC	challenge-200	C12H14O4	[55.0143, 69.0266, 77.0314, 105.0509, 115.0566, 123.0347, 133.0557, 134.039, 147.0447, 151.076, 152.0263, 152.0475, 153.0511, 159.5246, 160.0605, 161.0601, 162.0661, 163.0756, 164.0785, 165.0553, 167.071, 168.073, 176.0408, 177.0596, 178.0632, 179.0721, 180.0767, 181.0842, 190.0634, 191.0708, 191.8521, 191.8816, 192.0785, 192.519, 192.639, 193.0845, 194.0966, 195.103, 196.0972, 205.0872, 206.0915…	{'COC1Cc2c(cc(C=O)c(C)c2O)C1O', 'COc1cc2c(c(OC)c1CCO)C(=O)C2', 'CC1(C)OCc2c(C(=O)O)ccc(CO)c21', 'C=CCc1c(OC)c(C=O)c(C)c(O)c1O', 'CC1(C)C=Cc2c(CO)c(O)cc(O)c2O1', 'COc1c(C=CCO)c(OC)cc2c1CO2', 'C=CC1=C(O)C2C=CC(OC)C2(OC)C1=O', 'COC1Cc2c(cc(C=O)c(CO)c2O)C1', 'COCC1OC(=O)c2c(C)cc(C)c(O)c21', 'CC(=O)c1c(CO)cc2c(c1CO)OCC2', 'CC1(CO)OC2C(=O)C=CC3(C)C(=O)C1C23', 'C=CCc1c(O)c(CO)c2c(c1C)OCO2', 'COC1C(=O)c2…	0.560386
challenge-201	POSITIVE	867.1	14.45	379.175	76	C1CC2(C3(C(C1O)C1(C(CC3OC2)C)CC(OC1=O)c1cocc1)CO)O	challenge-201	C20H26O7	[81.0162, 95.0444, 105.0668, 142.0619, 157.101, 161.0587, 169.0985, 171.1192, 173.1067, 181.0978, 183.114, 185.0956, 195.1132, 199.1101, 201.0958, 203.0948, 207.1104, 209.0966, 219.103, 221.127, 223.1119, 225.1273, 228.5596, 229.5777, 231.111, 233.1312, 237.5604, 238.5643, 239.144, 241.1415, 245.11, 249.1283, 250.1285, 251.1468, 252.1433, 253.0872, 254.0793, 255.1132, 257.1412, 267.1385, 268.1395…	{'O=C1CCC2CC3C4CC(CC5C(O)C(O)C(=O)C54)C3(CC2O)C(=O)C1O', 'O=C1CCCC2C3CC4C5C(=O)OCC4C2C1C1C(O)C(O)C(O)C3C15O', 'O=C1CC2OCCCC23C(=O)OC2CCC(O)C4C5CCC(O5)C(O)C1C234', 'C=CC(CCC(=O)OC)(COC(C)=O)c1ccc(CC(=O)OC)cc1.O=C', 'C=CC(=CC(=O)OCC)C(CC(=O)OC)(Cc1ccco1)COC(=O)CC', 'O=C1CCCC2CCC3CC(O2)C2C1C2C1(O)CC2(O)C(O)CC(=O)OC231', 'C=CC(COC(C)=O)(CCOC(C)=O)Cc1ccc(OCC(=O)OC)cc1'}	0.502415
challenge-202	POSITIVE	1922.5	32.04	405.227	94	C(=C(C)C)Cc1c(OC)c(c2c(c1O)C(=O)C(C(O2)C)C)C(CC(=O)O)CCC	challenge-202	C23H32O6	[180.0416, 192.0395, 200.5525, 203.0785, 213.5507, 214.5523, 215.0846, 215.5496, 222.56, 223.095, 223.5563, 224.5546, 231.0552, 233.0785, 234.085, 235.0994, 247.0969, 250.1119, 251.5853, 260.1076, 273.1492, 275.0957, 275.7575, 276.1, 276.4225, 276.8442, 277.1309, 278.1457, 285.1456, 289.1412, 289.9245, 290.149, 291.1519, 303.1576, 304.1636, 305.1671, 306.1562, 319.1585, 320.1617, 329.1696, 331.15…	{'O=C(O)c1cc(C(=O)O)c2c(c1)CCCCCCCCCCCCCCC(=O)O2', 'O=C(O)c1ccc2c(c1)C(=O)OCCCCCCCCCCCCCCC(=O)O2', 'O=C1CC2(CCCCC2)C2(CCCCC2)C(C(=O)O)(CC(=O)O)C12CCCC2=O', 'O=C1CC2(CCCCC2)C2CC1C1(C(=O)O)C2C2(CCCCC2)C1(CO)C(=O)O', 'C=C(C)C12CC3C(CC(C)(O)C(C(=O)O)C3(C1)C(=O)OC)C1(CCCCC1)C2=O'}	0.50139
challenge-203	POSITIVE	823.5	13.72	265.143	32	C1C(=O)C(=C2C(C1)(CCC1(C2OC(=O)C1C)O)C)C	challenge-203	C15H20O4	[107.0809, 111.0791, 121.0986, 123.0801, 124.0759, 130.0779, 145.1026, 149.0974, 157.102, 163.1102, 173.0993, 174.0866, 174.1019, 186.1099, 191.1054, 192.1095, 193.1126, 201.1285, 202.0998, 202.1299, 203.1426, 204.1421, 219.1396, 220.1421, 221.1454, 229.1228, 230.1194, 247.1338, 248.1367, 249.1452, 250.1499, 265.144]	['OC12C(OC(=O)C1C)C1=C(C)C(=O)CCC1(C)CC2', 'C1(C)C2(O)C(C3=C(C)C(=O)CCC3(C)CC2)OC1=O', 'OC12C(C3=C(C)C(=O)CCC3(C)CC1)OC(=O)C2C', 'C1C2(C)C(=C(C)C(=O)CC2)C2C(O)(C(C)C(=O)O2)C1', 'O1C2C3=C(C)C(=O)CCC3(C)CCC2(O)C(C)C1=O', 'CC12C(=C(C)C(=O)CC1)C1C(O)(C(C)C(=O)O1)CC2', 'C12=C(C)C(=O)CCC1(C)CCC1(O)C(C)C(=O)OC21', 'O1C(=O)C(C)C2(O)CCC3(C)C(=C(C)C(=O)CC3)C12', 'O1C2C(O)(C(C)C1=O)CCC1(C)C2=C(C)C(=O)CC1', …	1
challenge-204	POSITIVE	522.5	8.71	495.186	37	c1c(ccc(c1)COC(=O)C(C(O)C)(Cc1ccc(cc1)O)O)OC1OC(C(C(C1O)O)O)CO	challenge-204	C24H30O11	[107.0481, 108.0489, 119.0509, 121.0633, 193.0823, 213.0934, 214.0913, 225.0919, 226.0933, 239.0905, 240.0877, 251.1125, 269.1149, 270.1169, 287.1234, 299.1301, 300.1329, 322.0188, 324.0237, 333.1328, 334.1271, 335.1213, 345.133, 346.1357, 347.1433, 396.0324, 398.0288, 399.0359, 399.1446, 400.1179, 423.145, 433.0551, 439.172, 440.1824, 443.063, 487.1782, 495.1854]		0
challenge-205	POSITIVE	1049.5	17.49	309.17	98	[C@H]12[C@H]([C@@H](C(=C(C1)C)[C@H](CCCOC(=O)C)C)O)C(=C)C(=O)O2	challenge-205	C17H24O5	[69.0608, 69.0767, 85.0456, 91.052, 95.0884, 105.069, 107.0807, 117.0632, 119.0841, 120.0871, 121.0655, 128.0588, 129.0692, 130.0745, 131.0772, 132.072, 132.0944, 133.0911, 142.0767, 143.0852, 143.7483, 144.0732, 144.0907, 145.1005, 146.09, 147.0805, 148.0798, 155.0863, 156.0266, 156.0923, 157.0968, 158.0624, 158.1039, 159.1136, 160.1194, 161.0905, 162.0826, 163.0758, 165.071, 170.1097, 171.1107,…		0
challenge-207	POSITIVE	534.5	8.91	447.186	67	c1c(ccc(c1)CCO[C@@H]1O[C@@H]([C@H]([C@@H]([C@H]1O)O)O)CO[C@@H]1OC[C@@H]([C@@H]([C@H]1O)O)O)OC	challenge-207	C20H30O11	[69.0324, 73.0323, 85.0216, 97.0072, 105.0676, 109.0154, 115.0263, 120.0633, 127.0362, 128.0468, 133.0524, 134.071, 135.0805, 144.0578, 145.0522, 149.096, 153.0893, 159.0849, 163.0596, 165.0897, 169.049, 177.0811, 179.0187, 185.0866, 186.0703, 189.0742, 189.09, 199.0407, 201.0879, 202.0821, 203.0951, 213.0896, 219.1011, 220.0902, 220.1196, 223.0614, 231.1028, 232.1019, 241.0732, 243.0997, 246.982…		0
challenge-209	POSITIVE	1903.4	31.72	421.165	40	c1(c(c2c(occ(c2=O)c2ccc(c(c2)O)O)c2c1OC(C=C2)(C)C)O)CC=C(C)C	challenge-209	C25H24O6	[203.4986, 204.4958, 213.0545, 214.0583, 230.5148, 231.5261, 232.0324, 232.5235, 240.5146, 252.0428, 258.5552, 259.5599, 347.0902, 364.6538, 364.9488, 365.1022, 365.3455, 365.8299, 365.9569, 366.1066, 366.3355, 366.4438, 366.6358, 366.7538, 366.955, 367.1131, 367.3643, 367.5682, 367.8537, 368.3457, 368.7479, 369.5468, 369.7641, 393.0618, 393.5815, 394.0576, 395.1154, 396.1312, 405.1328, 421.1655]		0
challenge-211	POSITIVE	954.8	15.91	317.175	30	c1c(ccc(c1)CCC(CC(CCc1ccc(cc1)O)O)O)O	challenge-211	C19H24O4	[77.0375, 105.0674, 107.0484, 108.0468, 121.0629, 133.0647, 134.0674, 145.0669, 146.0695, 147.0807, 148.0738, 159.0834, 161.0912, 162.0991, 186.0469, 186.5524, 187.066, 187.108, 188.1024, 205.1227, 206.0044, 250.0164, 263.142, 281.1549, 282.1627, 282.6797, 283.161, 299.1712, 300.1675, 317.1755]	['Oc1ccc(CCC(CC(CCc2ccc(O)cc2)O)O)cc1', 'c1(O)ccc(CCC(O)CC(CCc2ccc(O)cc2)O)cc1', 'c1cc(CCC(O)CC(O)CCc2ccc(O)cc2)ccc1O', 'C(O)(CCc1ccc(O)cc1)CC(CCc1ccc(O)cc1)O', 'OC(CCc1ccc(O)cc1)CC(CCc1ccc(O)cc1)O']	1
challenge-212	POSITIVE	1665.5	27.76	423.18	41	c1(cc(c2c(c1CC=C(C)C)oc(c(c2=O)CC=C(C)C)c1ccc(cc1O)O)O)O	challenge-212	C25H26O6	[203.5043, 204.5191, 228.05, 231.5311, 241.0483, 242.0539, 243.0894, 244.1028, 259.5661, 270.0511, 280.2381, 284.0637, 297.0874, 297.2441, 298.2465, 310.7032, 310.8932, 311.0595, 312.0601, 312.076, 312.6069, 313.4054, 313.5848, 314.275, 315.2454, 325.0857, 326.0755, 338.242, 350.1056, 367.1129, 368.1241, 368.1444, 369.1457, 369.168, 370.1539, 371.2028, 373.2443, 379.1221, 397.1568, 398.1614, 423.…	{'O=c1oc2c(cc1C1CCCCC1)C1(CCCCC1)c1c(cc3c(c1O)OCO3)C2=O'}	0.516256
challenge-214	POSITIVE	1890.7	31.51	365.175	89	c1(c(cc2c(c1O)C1C3C(O2)(C)CCC3C1(C)C)O)C(=O)c1ccccc1	challenge-214	C23H24O4	[55.0208, 69.03, 77.0254, 79.0441, 81.0675, 82.0706, 97.0708, 105.0316, 106.0258, 118.0862, 153.0067, 165.0128, 165.8436, 166.0238, 179.0356, 180.0361, 181.008, 207.0668, 207.3199, 207.5586, 207.8541, 208.0719, 208.3534, 208.6742, 208.8226, 209.0729, 209.3185, 209.767, 210.0775, 243.0701, 244.0715, 257.0834, 258.0883, 259.097, 281.0905, 282.0835, 282.1308, 284.5843, 284.6608, 284.864, 284.9774, 2…	['C1C2(C)C3C(C(C)(C)C3c3c(O)c(C(=O)c4ccccc4)c(O)cc3O2)C1', 'Oc1c(C(=O)c2ccccc2)c(O)cc2c1C1C3C(C)(O2)CCC3C1(C)C']	1
challenge-215	POSITIVE	486.7	8.11	354.134	32	C1(=O)C2(Cc3c1c1c(cc3)OCO1)c1cc(c(cc1CCN2C)OC)O	challenge-215	C20H19NO5	[119.0304, 179.0941, 261.0552, 265.0864, 280.073, 292.0766, 293.0813, 294.3325, 294.8315, 295.0961, 297.076, 297.5832, 305.0814, 305.8669, 306.1044, 307.1096, 311.0907, 312.0968, 320.0923, 323.0894, 323.7817, 324.0947, 324.5464, 325.6622, 326.12, 336.1217, 337.1258, 337.5239, 338.1251, 347.6331, 348.569, 354.1326]	{'C=Cc1ccc2c(c1)C(=O)c1cc(OC)c(OC)c(OC)c1C(=O)C2N', 'C=CCc1c(C)c(OC)c(OC)c2c1oc1cc(OC)c(O)c(C#N)c12', 'C=CCc1cc2c(cc1OC)[o]c1c(C#N)c(OC)c(OCC)c(O)c12', 'O=C1C2=C(C(=O)c3ccccc32)C2(CCCCC2)C(=O)N1C(=O)CCO', 'C=CCc1c(O)c(OC)c(OC)c2c1oc1c(C#N)c(OC)cc(C)c12'}	0.633094
challenge-216	POSITIVE	841.5	14.03	493.134	8	O([C@@H]1O[C@@H]([C@@H](O)[C@H](O)[C@H]1O)CO)c1c(c(c2c(c1)oc(cc2=O)c1cc(c(cc1)O)OC)O)OC	challenge-216	C23H24O12	[257.9966, 312.0648, 330.0742, 331.081, 332.0882, 332.7275, 333.0953, 493.1345]		0
challenge-221	POSITIVE	1922.8	32.05	411.18	36	c1(c(cc2c(c1CC=C(C)C)oc1c(c2=O)c(cc(c1CC=C(C)C)O)O)O)OC	challenge-221	C24H26O6	[206.0223, 225.5138, 226.5278, 227.516, 272.0679, 329.0669, 330.0679, 353.1036, 354.5627, 354.741, 354.9456, 355.1171, 355.6057, 355.6551, 355.8728, 355.9662, 356.1216, 356.3047, 356.3432, 356.5389, 356.8681, 357.1235, 357.3607, 357.4459, 357.6391, 357.7372, 357.9651, 358.1317, 358.5351, 359.08, 359.2873, 359.5671, 385.13, 386.1238, 401.1131, 411.1782]		0
challenge-222	POSITIVE	1831.2	30.52	439.212	69	c1(c(c(c2c(c1)OCC(C2=O)c1c(c(c(cc1)O)CC=C(C)C)OC)O)CC=C(C)C)O	challenge-222	C26H30O6	[171.0801, 203.1058, 203.6322, 203.9124, 204.1071, 204.2161, 204.462, 204.6439, 205.1214, 206.1288, 206.5318, 218.5246, 219.0385, 219.5373, 220.5371, 221.0373, 221.5379, 231.0676, 267.0615, 315.0858, 316.0809, 326.3689, 327.0882, 342.0874, 351.1268, 352.1287, 355.1368, 357.0959, 382.5622, 382.6193, 382.9447, 383.0, 383.1479, 383.4916, 383.5869, 383.8036, 383.955, 384.153, 384.4157, 384.6679, 384.…		0
challenge-223	POSITIVE	563.2	9.39	330.134	7	c1cc(ccc1C(CNC(=O)/C=C/c1ccc(c(c1)OC)O)O)O	challenge-223	C18H19NO5	[145.0288, 177.0547, 178.059, 312.1235, 313.1271, 314.6429, 330.1334]		0
challenge-224	POSITIVE	1403.6	23.39	391.139	61	c1(c(c(c2c(c1)C1C(CO2)c2c(O1)c(c(c(c2)O)OC)OC)OC)OC)OC	challenge-224	C20H22O8	[78.0372, 109.0635, 137.0599, 154.0624, 156.0774, 169.0867, 182.0583, 182.0961, 183.0667, 184.0697, 192.0443, 196.8298, 196.9461, 197.0806, 197.4813, 197.655, 197.7529, 197.9626, 198.0865, 198.2945, 198.4113, 198.6161, 198.6554, 199.0919, 199.3427, 199.6233, 199.6604, 199.8672, 200.0389, 203.5074, 207.0758, 208.0663, 210.0776, 221.081, 222.0866, 227.0897, 228.5235, 235.5296, 236.0316, 236.5335, 2…	{'Cc1cc(C(=O)OC2CC3(C)C(C(=O)O)=C(C(C)C)C(=O)O3)c(C)c(O)c1O2', 'COC1(OC)C2CC3C(C2OC(=O)c2cc4c(c(C)c2C(C)O)OC4=O)C1O3', 'Cc1cc2c(cc1C(=O)OC13CCC(C(C)(C)O)(OC1=O)C3(C)C)OC(=O)O2', 'Cc1cc(C(=O)c2cc(O)c(O)c(OC)c2OC)c(C)c(C)c1OC(=O)CO', 'COc1cc(OC)c(OC)c2c1C(=O)OC2(O)C1=C(C(C)C)C(O)=C(C)C1=O', 'COCc1c(C)c(C(=O)Oc2cc(C)c3c(c2)OCO3)c(OC)c(O)c1OC', 'Cc1cc(C(=O)OCc2c(C)c(O)c(O)c(C)c2O)c(C)c(C(=O)O)c1OC', …	0.525452
challenge-229	POSITIVE	423.9	7.06	295.118	14	C(C(C(C)(C)O)O)(O)c1c(cc2c(c1)ccc(=O)o2)OC	challenge-229	C15H18O6	[146.0385, 162.0231, 175.0396, 189.0563, 205.0444, 206.0573, 216.0452, 219.0661, 220.0683, 260.9781, 277.1012, 288.9828, 289.9829, 295.1177]	['c1(=O)ccc2cc(C(C(O)C(C)(C)O)O)c(OC)cc2o1', 'c1(C(C(C(O)(C)C)O)O)cc2ccc(=O)oc2cc1OC', 'CC(C(O)C(c1cc2c(cc1OC)oc(=O)cc2)O)(C)O', 'OC(C(O)c1c(OC)cc2c(ccc(=O)o2)c1)C(C)(O)C', 'CC(C)(O)C(O)C(O)c1c(OC)cc2c(ccc(=O)o2)c1', 'CC(C(C(c1c(OC)cc2c(c1)ccc(=O)o2)O)O)(O)C', 'OC(C(C)(O)C)C(O)c1cc2c(cc1OC)oc(=O)cc2', 'OC(C(C)(C)O)C(O)c1c(OC)cc2c(ccc(=O)o2)c1', 'c12ccc(=O)oc1cc(OC)c(C(O)C(C(O)(C)C)O)c2', 'COc1cc2…	1
challenge-230	POSITIVE	1198	19.97	367.212	88	C1(C(O)C2(C3(C(C1)C(C(CC3)C)(C)CCC1=CC(OC1=O)O)C)CO2)O	challenge-230	C20H30O6	[91.0489, 93.0675, 95.0768, 105.067, 107.0834, 109.0843, 119.0838, 121.0979, 123.0775, 129.0688, 131.0669, 133.0977, 135.0956, 142.0771, 143.0825, 145.1023, 147.1059, 155.0729, 157.0966, 159.1175, 161.1154, 169.0968, 171.1132, 173.1224, 175.1337, 185.1309, 187.1456, 188.1552, 189.1574, 195.1123, 199.1486, 200.1487, 201.1686, 202.0511, 203.1289, 209.1273, 211.1409, 213.1584, 217.1566, 221.1586, 22…		0
challenge-234	POSITIVE	1667.4	27.79	331.19	40	C1(C=C2C3(C(C1)C(C(CC3)C)(CCc1cocc1)C)COC2=O)O	challenge-234	C20H26O4	[131.085, 143.0793, 145.0979, 169.0951, 171.1118, 183.1085, 187.1178, 197.0985, 213.0525, 213.5767, 214.5797, 219.1405, 228.0361, 237.155, 239.1749, 255.1662, 257.1571, 265.1656, 267.1724, 268.1723, 268.2159, 269.178, 283.17, 284.1753, 285.1744, 286.1754, 295.1687, 296.1677, 297.1809, 299.179, 301.1808, 302.1889, 310.1076, 313.1776, 314.1787, 315.1941, 316.206, 317.1828, 318.2063, 331.1902]	['C1(CCc2ccoc2)(C)C2C3(CCC1C)COC(=O)C3=CC(O)C2', 'C123C(CC(O)C=C1C(=O)OC2)C(C)(CCc1cocc1)C(C)CC3', 'C12C(C)(CCc3ccoc3)C(C)CCC13C(=CC(O)C2)C(=O)OC3', 'c1cc(CCC2(C)C3C4(COC(=O)C4=CC(O)C3)CCC2C)co1', 'O=C1C2=CC(O)CC3C2(CCC(C)C3(CCc2ccoc2)C)CO1', 'CC1CCC23C(C1(CCc1cocc1)C)CC(O)C=C2C(=O)OC3', 'CC1CCC23C(=CC(O)CC2C1(C)CCc1ccoc1)C(=O)OC3', 'C1(C)(CCc2ccoc2)C2CC(O)C=C3C2(COC3=O)CCC1C', 'OC1C=C2C(=O)OCC23…	1
challenge-235	POSITIVE	710.5	11.84	354.134	12	c12c(cc3c(c1)CCN(Cc1c(CC3=O)cc3c(c1)OCO3)C)OCO2	challenge-235	C20H19NO5	[188.0695, 190.2634, 206.0818, 248.0804, 291.0748, 306.1043, 324.117, 337.1279, 338.1289, 347.6503, 348.1522, 354.1333]	['C1Cc2c(cc3c(c2)OCO3)C(=O)Cc2c(cc3c(c2)OCO3)CN1C']	1
challenge-236	POSITIVE	1598.7	26.64	255.138	64	c1cccc(c1)C(=O)CC(CCc1ccccc1)O	challenge-236	C17H18O2	[77.0324, 91.051, 92.0438, 105.0321, 105.5537, 115.0553, 116.0607, 117.0687, 117.7589, 118.0745, 120.0494, 121.066, 133.0676, 156.0251, 157.045, 157.0677, 164.0031, 175.5416, 176.542, 177.5388, 187.9888, 189.0055, 189.9969, 191.0091, 192.0142, 193.0097, 193.0985, 194.0012, 194.0171, 197.0217, 204.0613, 205.0093, 207.0182, 214.0882, 214.5522, 219.1198, 220.0852, 221.5839, 222.0638, 222.077, 222.56…	['c1ccccc1CCC(O)CC(=O)c1ccccc1', 'c1cccc(CCC(O)CC(c2ccccc2)=O)c1', 'C(c1ccccc1)CC(O)CC(=O)c1ccccc1', 'O=C(CC(CCc1ccccc1)O)c1ccccc1', 'O=C(CC(CCc1ccccc1)O)c1ccccc1', 'c1cccc(CCC(CC(c2ccccc2)=O)O)c1', 'c1ccccc1CCC(CC(=O)c1ccccc1)O', 'C(=O)(CC(O)CCc1ccccc1)c1ccccc1', 'C(C(O)CC(=O)c1ccccc1)Cc1ccccc1']	1
challenge-240	POSITIVE	369.6	6.16	407.134	28	c1(cc(c2c(c1)OC(C(C2)O)c1ccc(cc1)O)O)OC1OC(C(C1O)O)CO	challenge-240	C20H22O9	[107.0482, 108.0474, 139.0392, 140.0391, 149.0589, 150.0562, 169.0526, 191.0716, 251.9694, 257.082, 271.0829, 275.0919, 275.8052, 276.0992, 276.2491, 276.4617, 276.7294, 277.0979, 277.5318, 277.7146, 278.0783, 323.9879, 329.0049, 370.0081, 372.0228, 389.1238, 390.1115, 407.1349]		0
